# Supplementary material for: Spatiotemporal Assessment of PM2.5-Related Economic Losses from Health Impacts during 2014–2016 in China
Source: MDPI journal article supplement (doi:10.3390/ijerph15061278), 2018-06-16
Supplement: s1 [file s1]

# Spatiotemporal Assessment of PM<sub>2.5</sub>-Related Economic Losses from Health Impacts during 2014–2016 in China

Yang Yang <sup>1,†</sup>, Liwen Luo <sup>1,†</sup>, Chao Song <sup>1,2,3,\*</sup>, Hao Yin <sup>2,4</sup> and Jintao Yang <sup>1</sup>

<sup>1</sup> School of Geoscience and Technology, Southwest Petroleum University, Chengdu 610500, China; swpu\_yangy@126.com (Y.Y.); swpu\_ssdata\_lab@126.com (L.L.); believeyjt@163.com (J.Y.)

<sup>2</sup> State Key Laboratory of Environmental Simulation and Pollution Control, School of Environment, Beijing Normal University, Beijing 100875, China; yinhao@mail.bnu.edu.cn

<sup>3</sup> Department of Geography, Dartmouth College, Hanover, New Hampshire 03755, USA

<sup>4</sup> Department of Planning, Danish Centre for Environmental Assessment, Aalborg University, 14, 9000 Aalborg, Denmark

\* Correspondence: songc345@163.com; Tel.: +86-28-8303-7107

† Yang Yang and Liwen Luo contributed equally to this paper

## Contents

1. Source of the health impacts assessment model parameters and the disease data
2. Assumption cells and forecast cells used for uncertainty analysis
3. PM<sub>2.5</sub>-related health impacts and changes in all-cause mortality from 2014 to 2016 in 190 Chinese cities
4. PM<sub>2.5</sub>-related economic losses from health impacts and changes in total economic losses from 2014 to 2016 in 190 Chinese cities
5. References

### 1. Source of the health impacts assessment model parameters and the disease data

Table S1 shows the detailed information of those references in the previous research [1], which includes study areas, exposed population, periods, pollutants, and outcomes. In their analysis, they referred to 24 research results, includes reviews [10, 13, 15], summary [16], meta-analysis of the coefficients associating PM<sub>2.5</sub> exposure and health responses [2-3, 18-20], many of which are the latest research results [2, 4, 16-17, 22, 25], and giving priority to studies performed in China [2-4, 8, 18-20, 23, 25] to maximize regional accuracy.

According to the literature, PM<sub>2.5</sub> exposure is related to various adverse health impacts. Health impacts of PM<sub>2.5</sub> were classified to avoid double counting in the successive assessment step. Health impacts were classified into the two categories of mortality and morbidity impacts. Furthermore, they were categorized as either chronic or acute impacts. It should be noted that some health endpoints would occur under both short-term and long-term exposure. For example, the respiratory diseases include both chronic bronchitis and asthma attacks according the 10th version of the International Classification of Diseases (ICD-10) report, so adding the costs of respiratory disease, chronic bronchitis, and asthma attack together will result in double counting.

**Table S1.** The detailed information of the references in Yin's research

| Study area                       | Population                       | Period     | Pollutants                             | Outcomes                                                                                                                                                                                                                                                                  | Field                                                                                                       | Adapted from |
|----------------------------------|----------------------------------|------------|----------------------------------------|---------------------------------------------------------------------------------------------------------------------------------------------------------------------------------------------------------------------------------------------------------------------------|-------------------------------------------------------------------------------------------------------------|--------------|
| Beijing-Tianjin-Hebei            | All                              | 2009       | PM <sub>2.5</sub>                      | The total health benefit accounted for 1.66%~6.94% of the GDP of this region in 2009.                                                                                                                                                                                     | Meta-analysis of PM-related health impacts, and evaluate health economic loss                               | [2]          |
| 111 cities in China              | All                              | 2004       | PM <sub>10</sub>                       | The total economic cost was estimated at approximately US\$ 29,178.7 million.                                                                                                                                                                                             | Meta-analysis on PM-related health impacts, and evaluate health economic loss                               | [3]          |
| 31 cities in China               | 70,947 middle-aged men and women | 1991-2000  | TSP; SO <sub>2</sub> ; NO <sub>x</sub> | Each 10 µg/m <sup>3</sup> elevation of TSP was associated with a 0.9% (0.3%, 1.5%) increased risk of cardiovascular mortality                                                                                                                                             | Exposure and mortality                                                                                      | [4]          |
| US                               | 44 senior citizens (age≥ 60)     | 9:45-14:30 | PM <sub>2.5</sub>                      | An interquartile increase in the 5-day mean PM <sub>2.5</sub> (6.1 µg/m <sup>3</sup> ) was associated with a 14% increase in CRP (95% CI, -5.4 to 37%) for all individuals and an 81% (95% CI, 21 to 172%) increase for persons with diabetes, obesity, and hypertension. | Associations between ambient PM and markers of systemic inflammation                                        | [5]          |
| 204 US urban counties            | >200 000                         | 1999-2002  | PM <sub>2.5</sub>                      | Relative risk1.28% (0.78%–1.78%)                                                                                                                                                                                                                                          | Cardiovascular and respiratory hospital admissions associated with short-term exposure to PM <sub>2.5</sub> | [6]          |
| United States metropolitan areas | Ranged 319 000 - 500 000         | 1982-1998  | PM <sub>10</sub> ; PM <sub>2.5</sub>   | Cardiovascular causes of death, a 10µ/m <sup>3</sup> increase in fine PM was associated with 8% to 18% increases in mortality risk                                                                                                                                        | Cohort studies: Cardiovascular mortality and long-term exposure to particulate air pollution                | [7]          |

**Table S1.** *Cont.*

|                                                                               |           |            |                                                                       |                                                                                                                                                                                                                                                                                                                                                                                               |                                                                                                                                            |      |
|-------------------------------------------------------------------------------|-----------|------------|-----------------------------------------------------------------------|-----------------------------------------------------------------------------------------------------------------------------------------------------------------------------------------------------------------------------------------------------------------------------------------------------------------------------------------------------------------------------------------------|--------------------------------------------------------------------------------------------------------------------------------------------|------|
| Pearl River Delta                                                             | 18820000  | 2006       | PM <sub>2.5</sub> ; PM <sub>10</sub>                                  | PM <sub>10</sub> -related economic loss accounted for 0.09%-0.13% GDP of PRD in 2006                                                                                                                                                                                                                                                                                                          | Meta-analysis on PM-related health impacts, and evaluate health economic loss                                                              | [8]  |
| Madrid, Spain                                                                 | — —       | 1995-1998  | PM <sub>10</sub> ; SO <sub>2</sub> ; NO <sub>2</sub> ; O <sub>3</sub> | Relative risk: 1.039 for PM <sub>10</sub> ; 1.029 for SO <sub>2</sub> ; 1.033 for NO <sub>2</sub> ; and 1.045 for O <sub>3</sub> .                                                                                                                                                                                                                                                            | Short-term effects of air pollution on daily asthma                                                                                        | [9]  |
| 80 recently published epidemiologic studies                                   | — —       | Since 1985 | Particulate pollution                                                 | Observed Particulate pollution related health effects include increased respiratory symptoms, decreased lung function, increased hospitalizations and other health care visits for respiratory and cardiovascular disease, increased respiratory morbidity as measured by absenteeism from work or school or other restrictions in activity, and increased cardiopulmonary disease mortality. | Review: those evaluated effects of particulate pollution at concentrations commonly observed in contemporary cities in the developed world | [10] |
| Switzerland (Aarau, Basel, Davos, Geneva, Lugano, Montana, Payerne, and Wald) | age 18-60 | 1991       | PM <sub>10</sub> ; TSP; NO <sub>2</sub> ; O <sub>3</sub>              | <b>PM<sub>10</sub>-related RR:</b> 1.35 (1.11 to 1.65) for chronic phlegm production; 1.27 (1.08 to 1.50) for chronic cough or phlegm production; 1.48 (1.23 to 1.78) for breathlessness during the day; 1.33 (1.14 to 1.55) for breathlessness during the day or at night; and 1.32 (1.18 to 1.46) for dyspnea on exertion.                                                                  | Long-term ambient air pollution and respiratory symptoms                                                                                   | [11] |
| 23 Apeis cities                                                               | age ≥30   | 1999       | PM <sub>2.5</sub>                                                     | 16,926 premature deaths from all causes, including 11,612 cardiopulmonary deaths and 1901 lung-cancer deaths                                                                                                                                                                                                                                                                                  | Health impact assessment of long-term exposure to PM <sub>2.5</sub>                                                                        | [12] |
| Malaysia                                                                      | — —       | — —        | — —                                                                   | See more in [13]                                                                                                                                                                                                                                                                                                                                                                              | Review of air pollution and health impacts                                                                                                 | [13] |
| 29 European cities                                                            | — —       | Short-term | PM <sub>10</sub>                                                      | 0.76% (95% confidence interval = 0.47 to 1.05%) in cardiovascular deaths and 0.58% (0.21 to 0.95%) in respiratory deaths                                                                                                                                                                                                                                                                      | Short-term effects of ambient particles on cardiovascular and respiratory mortality.                                                       | [14] |

**Table S1. Cont.**

|                                         |        |           |                                            |                                                                                                                                                                                                                                                                                                                                                                                                                                                      |                                                                                                 |      |
|-----------------------------------------|--------|-----------|--------------------------------------------|------------------------------------------------------------------------------------------------------------------------------------------------------------------------------------------------------------------------------------------------------------------------------------------------------------------------------------------------------------------------------------------------------------------------------------------------------|-------------------------------------------------------------------------------------------------|------|
| --                                      | --     | --        | PM <sub>2.5</sub>                          | Excess risk per 10 µg/m <sup>3</sup> increase in PM <sub>2.5</sub> exposure was 6% (95% CI 4, 8%) for all-cause and 11% (95% CI 5, 16%) for cardiovascular mortality.                                                                                                                                                                                                                                                                                | Long-term air pollution exposure and cardio-respiratory mortality: a review                     | [15] |
| European                                | All    | Long-term | PM <sub>10</sub> ; PM <sub>2.5</sub>       | See more in [16]                                                                                                                                                                                                                                                                                                                                                                                                                                     | Summary: Air pollution public related health burden                                             | [16] |
| US                                      | age≥20 | 2004-2005 | PM <sub>2.5</sub>                          | 10 µg/m <sup>3</sup> increase in PM <sub>2.5</sub> exposure (2004: 0.77 [95% CI 0.39–1.25], P 0.001; 2005: 0.81 [0.48–1.07], P 0.001)                                                                                                                                                                                                                                                                                                                | The association between PM <sub>2.5</sub> exposure and diabetes prevalence                      | [17] |
| China                                   | All    | Long-term | PM <sub>10</sub> ; PM <sub>2.5</sub>       | PM <sub>2.5</sub> concentration increased 10µg/m <sup>3</sup> , a 0.40% (95%CI: 0.19%~0.62%) increase for all-course mortality, 1.43% (95%CI: 0.85%~2.01%) increase for respiratory death and 0.53% (95%CI:0.15%~0.90%) increase for cardiovascular death                                                                                                                                                                                            | Meta-analysis: PM-related health impacts                                                        | [18] |
| Shanghai                                | All    | 2001      | PM <sub>2.5</sub> ; PM <sub>10</sub> ; TSP | The total economic cost of health impacts account for 1.03% of GDP of the city.                                                                                                                                                                                                                                                                                                                                                                      | Meta-analysis: PM-related health impacts, and evaluate health economic loss                     | [19] |
| China                                   | All    | 1990-2002 | PM <sub>2.5</sub> ; PM <sub>10</sub> ; TSP | See reference [19]                                                                                                                                                                                                                                                                                                                                                                                                                                   | Meta-analysis: Air Particulate Matter -related health impacts                                   | [20] |
| 12 European cities in the APHEA project | --     | --        | SO <sub>2</sub> and PM <sub>10</sub>       | In western European cities it was found that an increase of 50 µg/m <sup>3</sup> in sulphur dioxide or black smoke was associated with a 3% (2%, 4%) increase in daily mortality and the corresponding figure for PM <sub>10</sub> was 2% (1% to 3%). In central eastern European cities the increase in mortality associated with a 50 µg/m <sup>3</sup> change in sulphur dioxide was 0.8% (-0.1% to 2.4%) and in black smoke 0.6% (0.1% to 1.1%). | The associations between all-cause mortality and ambient particulate matter and sulphur dioxide | [21] |

**Table S1.** *Cont.*

|                                |                         |           |                                                                                           |                                                                                                                                                                                                                                                 |                                                                                                                |      |
|--------------------------------|-------------------------|-----------|-------------------------------------------------------------------------------------------|-------------------------------------------------------------------------------------------------------------------------------------------------------------------------------------------------------------------------------------------------|----------------------------------------------------------------------------------------------------------------|------|
| The Northeastern United States | 9.8 million (age ≥ 65 ) | 1999-2010 | PM <sub>2.5</sub>                                                                         | A hazard ratio (HR) of 1.08 (95% CI: 1.05, 1.11) for dementia, an HR of 1.15 (95% CI: 1.11, 1.19) for AD, and an HR of 1.08 (95% CI: 1.04, 1.12) for PD admissions per 1-μg/m <sup>3</sup> increase in annual PM <sub>2.5</sub> concentrations. | Long-term PM <sub>2.5</sub> Exposure and Neurological Hospital Admissions                                      | [22] |
| Hongkong                       | 69716 admissions        | 200-2005  | NO <sub>x</sub> ; SO <sub>2</sub> ; O <sub>3</sub> ; PM <sub>2.5</sub> ; PM <sub>10</sub> | The relative risks (RR) for hospitalization for every 10 μg/m <sup>3</sup> increase in NO <sub>2</sub> , O <sub>3</sub> , PM <sub>10</sub> and PM <sub>2.5</sub> were 1.028, 1.034, 1.019 and 1.021, respectively                               | Ambient air pollutants and hospitalization rates for asthma                                                    | [23] |
| 50 states in US                | 500000 adults           | 1982-1998 | Particulate pollution                                                                     | Each 10 μg/m <sup>3</sup> elevation in fine particulate air pollution was associated with approximately a 4%, 6%, and 8% increased risk of all-cause, cardiopulmonary, and lung cancer mortality                                                | Long-term exposure to fine particulate air pollution and all-cause, lung cancer, and cardiopulmonary mortality | [24] |
| China                          | All                     | 2012      | Air pollution                                                                             | See Table S3                                                                                                                                                                                                                                    | Baseline incidence rates                                                                                       | [25] |

As a result, Yin utilized the ICD-10 report to avoid double counting of PM<sub>2.5</sub> health impacts. According to the ICD-10 disease classification, there are six main categories of diseases related to the PM<sub>2.5</sub> pollutants: circulatory system disease; respiratory disease; endocrine, nutritional and metabolic diseases; neoplasms; mental and behavioral disorder and nervous system diseases. The main ICD-10 health endpoints related to PM<sub>2.5</sub> are reported in Table S2 together with their ICD-10 codes and the sources reporting their epidemiological evidence.

**Table S2.** PM<sub>2.5</sub>-related health endpoints according to the ICD-10 reports and literature evidence [1]

| Mortality         |                                          |                                                            |                                        |                                                                      |
|-------------------|------------------------------------------|------------------------------------------------------------|----------------------------------------|----------------------------------------------------------------------|
|                   | Diseases of the circulatory system [IX]  | Neoplasms [II]                                             | Diseases of the respiratory system [X] |                                                                      |
| Chronic mortality | Cardiovascular Mortality [I51.6] [7]     | Lung cancer mortality [C34.9] [24]                         | Respiratory mortality [J00-J99] [15]   |                                                                      |
|                   | Cardiopulmonary Mortality [I27.9] [12]   |                                                            |                                        |                                                                      |
| Acute mortality   | Cardiovascular mortality [I51.6] [14,21] |                                                            | Respiratory Mortality [J00-J99] [14]   |                                                                      |
| Morbidity         |                                          |                                                            |                                        |                                                                      |
|                   | Diseases of the circulatory system [IX]  | Diseases of the respiratory system [X]                     |                                        |                                                                      |
| Acute morbidity   |                                          | Respiratory diseases [6]                                   |                                        |                                                                      |
|                   | Cardiovascular disease [I51.6] [6]       | Acute bronchitis [J20-J22] [8]<br>Asthma attacks [J45] [9] |                                        |                                                                      |
|                   | Diseases of the respiratory system [X]   | Endocrine, nutritional and metabolic diseases [IV]         | Diseases of the nervous system [VI]    | Mental and behavioral disorders [V]                                  |
| Chronic morbidity | Chronic bronchitis [J41] [11]            | Diabetes [E11] [5, 17]                                     | Alzheimer [G30.1] [22]                 | Dementia [F03] [22]                                                  |
|                   | Asthma attacks [J45] [9]                 | Obesity [E66] [5]                                          | Parkinson [22]                         | Mild cognitive disorder[F06.7] [16]<br>Childhood autism [F84.0] [16] |
| Undefined         | Restricted activity day [10, 13]         | Internal medicine outpatient visits [10]                   | Pediatric outpatient visits [10]       |                                                                      |

Notes: An empty cell means that no health endpoint has been reported in that category according to the authors' knowledge; "[code]" denotes the disease classification code according to the ICD-10 report.

Moreover, based on the health impact identification and classification, PM<sub>2.5</sub> health impacts were estimated for cardiovascular mortality, cardiopulmonary mortality, lung cancer mortality, respiratory mortality, chronic bronchitis, cardiovascular hospitalization, acute bronchitis, and asthma attacks. Exposed coefficients in Yin's study were selected according to those studies (Table 1), different health endpoints selected the latest research results in their field separately, as shown in Table S3. If there were several studies describing the exposure-response function for the same health endpoint, they used the pooled estimate to get the mean and 95 percent confidence interval (CI) of the coefficient. This meta-analysis method was based on the variance weighted average across the results of studies with available quantitative effect estimates (coefficients or relative risks). Studies with lower standard errors had more weight in the resulting joint estimate. In addition, some studies using TSP and PM<sub>2.5</sub> for exposure assessment were also included in the analysis. The following conversion factors were applied for different particulate matter indicators: PM<sub>10</sub>=TSP×0.65 and PM<sub>2.5</sub>=PM<sub>10</sub>×0.65 [20]

**Table S3.** PM<sub>2.5</sub> exposure-response coefficients and baseline incidence rates for the analyzed health endpoints [1]

| Health impact                     | Exposure time | Population | $\beta_i$ (CI=95%)                     | $E_{0i}$      |
|-----------------------------------|---------------|------------|----------------------------------------|---------------|
| All-cause mortality               | Long-term     | All        | 9.00E-04 (0, 1.8E-03) [4]              | 6.14E-03 [25] |
| Cardiovascular mortality          | Long-term     | All        | 5.30E-04 (1.50E-04, 9.00E-04) [18]     | 2.69E-03 [25] |
| Respiratory mortality             | Long-term     | All        | 1.43E-03 (8.50E-04, 2.01E-03) [18]     | 5.80E-04 [25] |
| Lung cancer mortality             | Long-term     | Age≥15     | 3.40E-03 (0.00E+00, 7.10E-03) [4]      | 4.97E-04 [25] |
| Chronic bronchitis                | Long-term     | All        | 2.7E-03 (7.62E-04, 4.64E-03) [3,19,20] | 6.94E-03 [2]  |
| Cardiovascular hospital admission | Short-term    | All        | 6.80E-04 (4.30E-04, 9.30E-04) [2]      | 5.46E-03 [2]  |
| Asthma attack                     | Short-term    | All        | 2.10E-03 (1.45E-03, 2.74E-03) [23]     | 9.40E-03 [2]  |
| Acute bronchitis                  | Short-term    | All        | 7.90E-03 (2.70E-03, 1.30E-02) [8]      | 3.80E-02 [2]  |

Lastly, considering that both of our study areas belong to China, and their article has just been published, our research was conducted at a similar time in terms of timeliness. Taking the above factors into account, we believe that their results are reliable, and cited their meta-analysis results as the source of disease data in this study.

## 2. Assumption cells and forecast cells used for uncertainty analysis

The uncertainty analysis covered PM<sub>2.5</sub> exposure concentration, exposure-response coefficients, and health-related economic loss per case. In addition, AHC values were calculated based on the per capita GDP, and because the uncertainty of this estimate was unknown, the

uncertainty of economic losses from mortality estimated using the AHC approach was not included in this study.

First, we built assumption cells (see Table 4) in Crystal ball software according to the above uncertainty analysis, and their probability distribution obtains from the results of previous studies (see Table S4).

**Table S4.** Assumption cells and assigned probability distribution [1]

| Assumption cells                       | Health impact                     | Probability distribution | Values<br>Mean (Std)                       | Units              |
|----------------------------------------|-----------------------------------|--------------------------|--------------------------------------------|--------------------|
| Exposure-response coefficients $\beta$ |                                   | Lognormal                | See S1                                     | m <sup>3</sup> /μg |
| Exposure concentration C               |                                   | Lognormal                |                                            | μg/m <sup>3</sup>  |
| Economic loss for premature death j    | All-cause mortality               | Lognormal                | VSL: 232,000<br>(1.43)<br>AHC: 132,000 (1) | US \$ in<br>2012   |
| Cost j (diseases)                      | Chronic bronchitis                | Lognormal                | VSL: 13,000 (1.43)<br>AHC: 7,000 (1)       | US \$ in<br>2012   |
| Cost j (diseases)                      | Cardiovascular hospital admission | Lognormal                | COL:1600(1.23)                             | US \$ in<br>2012   |
| Cost j (diseases)                      | Asthma attack                     | Lognormal                | WTP:7(1.27)                                | US \$ in<br>2012   |
| Cost j (diseases)                      | Acute bronchitis                  | Lognormal                | WTP:9(1.25)                                | US \$ in<br>2012   |

Then, we built forecasting cells (see Table S5) with equations (to calculate health economic loss by VSL) and dependent assumption cells.

**Table S5.** Forecasting cells with equations and dependent assumption cells

| Forecasting cells   | Equation                                                   | Assumption cells                                                                                                              |
|---------------------|------------------------------------------------------------|-------------------------------------------------------------------------------------------------------------------------------|
| Total economic loss | $EC_{ij} = Pop_i * E_{0i} * e^{\beta(C_i - C_0)} * Cost_j$ | Exposure-response coefficients $\beta$<br>Exposure concentration C<br>$Cost_j$ Economic loss for health endpoint j (diseases) |



### 3. PM<sub>2.5</sub>-related health impacts and changes in all-cause mortality from 2014 to 2016 in 190 Chinese cities

See Appendix S3: PM<sub>2.5</sub>-related health impacts and changes in all-cause mortality from 2014 to 2016 in 190 Chinese cities.xls

### S4. PM<sub>2.5</sub>-related economic losses from health impacts and changes in total economic losses from 2014 to 2016 in 190 Chinese cities

See Appendix S4: PM<sub>2.5</sub>-related economic losses from health impacts and changes in total economic losses from 2014 to 2016 in 190 Chinese cities.xls

## 5. References

- [1] Yin, H.; Pizzol, M.; Xu, L. External costs of PM<sub>2.5</sub> pollution in Beijing, China: Uncertainty analysis of multiple health impacts and costs. *Environ. Pollut.* **2017**, 356-369. DOI: 10.1016/j.envpol.2017.02.029
- [2] Huang, D.; Zhang, S. Health benefit evaluation for PM<sub>2.5</sub> pollution control in Beijing-Tianjin-Hebei region of China. *China. Environ. Sci.* **2013**, 1, 166-174. (in Chinese) Available online: <http://zghjbh.com.cn/uploadfile/2016/0615/20160615101327987.pdf>
- [3] Zhang, M.; Song, Y.; Cai, X.; Zhou, J. Economic assessment of the health effects related to particulate matter pollution in 111 Chinese cities by using economic burden of disease analysis. *Environ. Manage.* **2008**, 4, 947-954. DOI: 10.1016/j.jenvman.2007.04.019
- [4] Cao, J.; Yang, C.; Li, J.; Chen, R.; Chen, B.; Gu, D.; Kan, H. Association between long-term exposure to outdoor air pollution and mortality in China: a cohort study. *J. Hazard. Mater.* **2011**, 186, 1594-1600. DOI: 10.1016/j.jhazmat.2010.12.036
- [5] Dubowsky, S.D.; Suh, H.; Schwartz, J.; Coull, B. A.; Gold, D. R. Diabetes, obesity, and hypertension may enhance associations between air pollution and markers of systemic inflammation. *Environ. Health Perspect.* **2006**, 992-998. <http://www.jstor.org/stable/3651767>
- [6] Dominici, F.; Peng, R. D.; Bell, M. L.; Pham, L.; McDermott, A.; Zeger, S. L.; Samet, J. M. Fine particulate air pollution and hospital admission for cardiovascular and respiratory diseases. *Jama* **2006**, 295, 1127-1134. DOI: 10.1001/jama.295.10.1127
- [7] Pope, C. A.; Burnett, R. T.; Thurston, G. D.; Thun, M. J.; Calle, E. E.; Krewski, D.; Godleski, J. J. Cardiovascular mortality and long-term exposure to particulate air pollution: epidemiological evidence of general pathophysiological pathways of disease. *Circ.* **2004**, 109, 71-77. DOI: 10.1161/01.CIR.0000108927.80044.7F
- [8] Liu, X.; Xie, P.; Liu, Z.; Li, T.; Zhong, L.; Xiang, Y. Economic assessment of acute health impact due to inhalable particulate air pollution in the Pearl River Delta. *J. Peking Uni.* (Natural Science, in Chinese). **2010**, 46, 829-834
- [9] Galan, I.; Tobias, A.; Banegas, J.; Aranguet, E. Short-term effects of air pollution on daily asthma emergency room admissions. *Eur. Respir. J.* **2003**, 22, 802-808. DOI: 10.1183/09031936.03.00013003
- [10] Pope III, C.; Bates, D. V.; Raizenne, M. E. Health effects of particulate air pollution: time for reassessment? *Environ. Health Perspect.* **1995**, 103, 472-480
- [11] Zemp, E.; Elsasser, S.; Schindler, C.; Kunzli, N. et al. Long-term ambient air pollution and

- respiratory symptoms in adults (SAPALDIA study). *Am. J. Respir. Crit. Care Med.* **1999.** 159, 1257-1266. DOI:10.1164/ajrccm.159.4.9807052
- [12] Boldo, E.; Medina, S.; Le Tertre, A.; Hurley, F.; Mücke, H. G.; Ballester, F.; Aguilera, I. Apheis: Health impact assessment of long-term exposure to PM<sub>2.5</sub> in 23 European cities. *Eur. J. Epidemiol.* **2006.** 21, 449-458. DOI: 10.1007/s10654-006-9014-0
- [13] Afroz, R.; Hassan, M. N.; Ibrahim, N. A. Review of air pollution and health impacts in Malaysia. *Environ. Res.* **2003.** 92, 71-77. DOI:10.1016/S0013-9351(02)00059-2
- [14] Analitis, A.; Katsouyanni, K.; Dimakopoulou, K.; Samoli, E.; Nikolouloupoulos, A. K.; Petasakis, Y.; Touloumi, G.; Schwartz, J.; Anderson, H. R.; Cambra, K. Short-term effects of ambient particles on cardiovascular and respiratory mortality. *Epidemiol.* **2006.** 17, 230-233. DOI: 10.1097/01.ede.0000199439.57655.6b
- [15] Hoek, G.; Krishnan, R. M.; Beelen, R.; Peters, A.; Ostro, B.; Brunekreef, B.; Kaufman, J. D. Long-term air pollution exposure and cardio-respiratory mortality: a review. *Environ. Health.* **2013.** 12, 43-57. <http://www.ehjournal.net/content/12/1/43>
- [16] Holgate, S.; Grigg, J.; Agius, R.; Ashton, J.R.; Cullinan, P.; Exley, K.; Fishwick, D.; Fuller, G.; Gokani, N.; Griffiths, C. Every breath we take: The lifelong impact of air pollution, Report of a working party. R. Coll. Physicians. **2016.** London. ISBN: 978-1-86016-567-2. Available on: <https://www.rcplondon.ac.uk/projects/outputs/every-breath-we-take-lifelong-impact-air-pollution>
- [17] Pearson, J. F.; Bachireddy, C.; Shyamprasad, S.; Goldfine, A. B.; Brownstein, J. S. Association between fine particulate matter and diabetes prevalence in the US. *Diabetes care.* **2010.** 33, 2196-2201. DOI: 10.2337/dc10-0698
- [18] Peng, X.; Xiaoyun, L.; Zhaorong, L.; Tiantian, L.; Yuhua, B. Study of exposure-response relationship of air particulate pollution in China. *China Environ. Sci.* (in Chinese) **2009.** 29, 1034-1040.
- [19] Kan, H.; Chen, B. Particulate air pollution in urban areas of Shanghai, China: health-based economic assessment. *Sci. Total Environ.* **2004.** 322, 71-79. DOI: 10.1016/j.scitotenv.2003.09.010
- [20] Kan, H.; Chen, B.; Chen, C.; Wang, B.; Fu, Q. Establishment of exposure-response functions of air particulate matter and adverse health outcomes in China and worldwide. *Biomed. Environ. Sci.* **2005.** 18, 159.
- [21] Katsouyanni, K.; Touloumi, G.; Spix, C.; Schwartz, J.; Balducci, F.; Medina, S.; Rossi, G.; Wojtyniak, B.; Sunyer, J.; Bacharova, L. Short term effects of ambient sulphur dioxide and particulate matter on mortality in 12 European cities: results from time series data from the APHEA project. *Bmj* **1997.** 314, 1658. DOI: 10.1136/bmj.314.7095.1658
- [22] Kioumourtoglou, M. A.; Schwartz, J. D.; Weisskopf, M. G.; Melly, S. J.; Wang, Y.; Dominici, F.; Zanobetti, A. Long-term PM<sub>2.5</sub> exposure and neurological hospital admissions in the Northeastern United States. *Environ. Health Perspect.* **2016.** 124, 23. DOI: 10.1289/ehp.1408973
- [23] Ko, F.; Tam, W.; Wong, T.; Lai, C.; Wong, G.; Leung, T.; Ng, S.; Hui, D. Effects of air pollution on asthma hospitalization rates in different age groups in Hong Kong. *Clin. Exp. Allergy.* **2007.** 37, 543-551. DOI: 10.1007/s11869-013-0195-x
- [24] Pope III, C. A.; Burnett, R. T.; Thun, M. J.; Calle, E. E.; Krewski, D.; Ito, K.; Thurston, G. D.

Lung cancer, cardiopulmonary mortality, and long-term exposure to fine particulate air pollution. *Jama* **2002**. 287, 1132-1141.DOI: 10.1001/jama.287.9.1132

- [25] NHFPC. China Health Statistical Yearbook. Pecking Union Medical College Press, **2013**. Beijing (National Health and Family Planning Commission).
