# Supplementary material for: Spatiotemporal Assessment of PM2.5-Related Economic Losses from Health Impacts during 2014–2016 in China
Source: Int J Environ Res Public Health. 2018 Jun 16;15(6):1278. doi: 10.3390/ijerph15061278 (PMC6024949; doi:10.3390/ijerph15061278)
Supplement: Supplementary file 1 [file ijerph-15-01278-s001.zip › S3ú▌PM2.5-related health impacts and changes in all-cause mortality from 2014 to 2016 in 190 Chinese cities.xls]

## Sheet:  PM2.5-related health impacts
Area	Pop_2014	Pop_2015	Pop_2016	2014									2015									2016
				All-cause mortality	Cardiovascular mortality	Respiratory mortality	Lung cancer mortality	Cardiovascular hospitalization	Chronic bronchitis	Acute bronchitis	Asthma attack	Total	All-cause mortality	Cardiovascular mortality	Respiratory mortality	Lung cancer mortality	Cardiovascular hospitalization	Chronic bronchitis	Acute bronchitis	Asthma attack	Total	All-cause mortality	Cardiovascular mortality	Respiratory mortality	Lung cancer mortality	Cardiovascular hospitalization	Chronic bronchitis	Acute bronchitis	Asthma attack	Total
AnShan	348.2	346	345.8	1181	302	181	390	4230	789	4376	79805	90381	1155	295	177	381	4131	771	4274	77724	88055	886	227	135	287	3131	593	3253	56702	64565
AnYang	443.52	445.78	448.18	2192	557	337	749	8047	1459	8254	163980	183932	2081	529	320	707	7603	1385	7810	152803	171682	1943	495	298	655	7064	1295	7270	139648	157220
BaoDing	1029.5	1034.9	1042.5	6594	1667	1020	2327	24773	4377	25212	543485	604441	5745	1456	885	1990	21294	3819	21771	447403	500032	4909	1248	754	1669	17955	3269	18440	361623	406196
BaoJi	375.32	376.33	377.5	1283	328	196	424	4596	856	4753	86804	98292	980	251	149	318	3464	655	3598	62870	71567	1044	267	159	340	3700	698	3840	67685	76967
BaoTou	279.9	282.9	285.8	658	169	100	213	2318	440	2411	41549	47376	639	164	97	206	2248	428	2339	40107	45761	587	151	89	188	2057	393	2143	36346	41526
BeiHai	160.4	162.57	164.37	185	48	28	59	639	124	669	10806	12423	178	46	27	56	614	120	643	10351	11906	166	43	26	52	573	112	600	9616	11067
BeiJing	2151.6	2170.5	2172.9	9220	2346	1412	3105	33497	6144	34480	660553	743894	8688	2213	1329	2907	31420	5792	32392	610965	689257	7753	1977	1184	2569	27846	5173	28774	529933	599479
BenXi	152.03	151.21	150	408	105	62	133	1443	273	1498	26274	29896	377	97	58	122	1330	252	1382	23992	27333	292	75	45	93	1019	195	1062	17903	20471
BinZhou	386.65	389.07	389.1	1654	421	254	557	6008	1102	6185	118424	133373	1530	390	234	511	5526	1020	5699	107073	120848	1415	361	216	470	5085	944	5253	97095	109792
CangZhou	768.4	774.4	779.54	3427	872	526	1159	12484	2283	12838	248315	279347	2633	672	402	870	9432	1758	9755	178014	201592	2565	655	391	845	9169	1712	9489	172112	195047
ChangChun	754.55	753.83	753.4	2371	606	362	779	8458	1584	8760	157613	178786	2322	593	354	761	8272	1551	8570	153679	174394	1531	393	232	490	5363	1024	5587	94657	108162
ChangDe	583.08	584.4	584.4	1933	494	295	637	6912	1290	7152	129892	147179	1293	331	196	416	4542	865	4728	80869	92297	1505	385	229	488	5319	1006	5526	96412	109768
ChangSha	671.41	680.36	764.52	2477	632	379	823	8913	1653	9204	170641	192888	1921	491	293	626	6818	1284	7073	125080	142176	1875	480	285	606	6616	1254	6877	119191	135813
ChangShu	150.97	151.01	151.26	372	95	57	120	1310	249	1362	23606	26899	396	102	61	129	1399	265	1453	25402	28915	332	85	51	107	1166	222	1214	20741	23675
ChangZhi	340.44	342.04	343.54	1087	278	166	357	3879	726	4017	72463	82172	1053	269	161	345	3751	703	3886	69664	79057	1145	293	175	378	4098	765	4240	77076	87324
ChangZhou	469.6	470.1	470.8	1504	384	230	495	5371	1005	5561	100377	113818	1299	333	198	423	4606	868	4780	84253	95806	1140	292	173	368	4018	762	4178	72273	82371
ChaoZhou	272.04	264.05	264.6	590	152	90	190	2072	395	2158	36821	42036	428	110	65	136	1488	287	1554	25743	29500	349	90	53	110	1206	234	1262	20568	23619
ChengDe	380.74	382.35	383.3	942	241	143	305	3323	630	3454	59924	68273	682	175	104	217	2378	457	2481	41471	47469	632	163	96	201	2201	424	2298	38130	43685
ChengDu	1442.74	1465.75	1591.76	5149	1313	786	1707	18494	3436	19111	351978	398168	4346	1111	662	1421	15460	2904	16028	285621	324359	4745	1213	723	1552	16881	3169	17499	312105	354399
ChiFeng	430.38	429.95	430.52	902	231	137	290	3163	604	3295	56001	63965	755	194	115	241	2634	506	2749	45874	52518	641	165	97	203	2225	429	2325	38245	43865
ChongQing	2991.4	3016.55	3048.43	8961	2290	1365	2932	31891	5986	33056	590060	669954	7654	1959	1163	2479	27041	5117	28098	489237	557147	7553	1933	1147	2442	26656	5050	27707	480862	547828
DaLian	594.29	593.56	669.04	1419	364	216	458	4999	949	5198	89772	102337	1258	323	191	404	4413	842	4596	78232	89341	1073	276	163	341	3735	719	3900	64575	74002
DanDong	239.5	238.2	237.9	515	132	79	166	1808	345	1882	32084	36634	486	125	74	156	1701	325	1772	30023	34307	431	111	66	138	1504	289	1569	26256	30049
DaQing	276	275.5	275.8	515	133	78	165	1800	345	1877	31516	36053	534	137	81	171	1869	358	1948	32828	37537	421	108	64	134	1462	282	1527	25175	28867
DaTong	339.19	340.64	342.19	624	160	95	199	2179	418	2273	38103	43597	571	147	87	182	1988	383	2076	34489	39507	511	132	78	162	1775	343	1854	30514	34997
DeYang	351.1	351.32	352	1026	262	156	335	3644	685	3779	67172	76306	854	219	130	276	3012	571	3131	54203	61771	846	217	129	274	2982	566	3101	53591	61086
DeZhou	570.51	574.23	579.23	3116	790	480	1077	11530	2071	11794	241151	269662	2985	758	459	1026	11000	1985	11268	227035	254273	2382	607	365	799	8629	1588	8890	168686	190175
DongZuo	834.31	825.41	826.14	1593	409	242	509	5572	1067	5809	97772	111813	1220	314	185	386	4237	818	4428	72814	83517	1163	299	176	367	4032	779	4215	69053	79242
DongYing	209.91	211.06	213.21	807	206	124	269	2910	538	3003	56130	63388	833	213	128	279	3010	556	3104	58367	65870	653	167	100	214	2326	436	2410	43163	48988
ordos	203.5	204.51	205.53	197	51	30	62	677	132	709	11343	13058	198	51	30	62	680	133	713	11399	13123	156	40	24	49	534	105	560	8859	10214
FoShan	735.06	743.06	746.27	1420	364	216	454	4968	951	5179	87273	99791	1217	313	185	387	4238	816	4425	73402	84098	1179	303	179	374	4100	790	4283	70814	81166
FuShun	217.4	215.7	214.8	572	147	87	186	2024	383	2102	36782	41863	518	133	79	167	1824	346	1896	32764	37348	404	104	62	129	1410	270	1470	24689	28243
FuYang	66.61	66.8	67.16	200	51	31	66	709	133	735	13099	14876	160	41	25	52	563	107	586	10107	11523	124	32	19	40	430	83	449	7519	8605
FuZhou	743	750	757	910	234	138	286	3146	610	3293	53417	61376	781	201	118	245	2694	524	2822	45329	52150	730	188	110	228	2513	490	2633	42128	48494
GuangZhou	1308.05	1350.11	1404.35	2772	710	421	889	9725	1855	10128	172402	196882	2175	559	329	690	7570	1457	7906	130947	150055	2039	524	309	645	7076	1366	7396	121466	139343
GuiLin	491.91	496.16	500.94	1458	373	222	477	5183	974	5374	95744	108733	1096	281	167	352	3849	733	4007	68523	78208	1039	267	158	333	3641	695	3793	64393	73561
GuiYang	455.6	462.18	469.68	909	233	138	291	3183	609	3318	56092	64111	729	188	111	231	2536	489	2649	43784	50187	704	181	107	223	2444	472	2554	42042	48216
Harbin	987.29	961.37	962.1	3473	886	530	1150	12464	2318	12883	236621	267759	3255	831	497	1074	11654	2172	12055	219797	248933	2231	571	339	719	7852	1492	8168	140544	160287
HaiKou	220.07	222.3	224.6	151	39	23	47	517	102	543	8547	9860	142	37	22	44	485	95	509	8004	9235	140	36	22	44	479	94	503	7902	9118
HaiMen	100.16	100.04	100.1	245	63	38	79	861	164	895	15499	17664	237	61	36	77	833	158	866	14931	17025	199	51	31	64	697	134	726	12271	14027
HanDan	1029.48	1049.7	1054.7	6098	1544	941	2129	22733	4051	23196	486693	542771	4859	1235	746	1649	17748	3236	18235	356026	400104	4247	1082	650	1422	15364	2831	15837	299091	337370
HangZhou	889.2	901.8	918.8	2583	660	393	844	9178	1726	9518	169050	192055	2310	591	351	749	8162	1544	8480	147838	168334	2009	515	305	646	7057	1344	7347	125516	143273
HeFei	769.6	779	786.9	3072	783	470	1028	11106	2048	11450	215828	243504	2437	623	372	800	8692	1628	9003	161875	183635	2104	539	320	684	7450	1407	7735	135675	154371
HeZe	843.79	850.03	862.26	4354	1105	670	1495	16039	2897	16433	330432	370155	4111	1044	632	1401	15065	2737	15462	305360	342735	3509	894	537	1176	12702	2339	13090	247806	279446
HeYuan	306.32	307.35	308.1	520	134	79	166	1812	349	1892	31471	36044	419	108	64	132	1450	281	1517	24783	28450	368	95	56	116	1272	247	1331	21556	24774
HengShui	432.72	443.54	445.31	2400	609	370	831	8893	1595	9093	186794	208775	2261	574	348	775	8319	1504	8526	170821	191431	1964	500	301	663	7149	1309	7354	141851	159627
Hohhot	303.06	305.96	308.9	578	149	88	185	2021	387	2107	35456	40549	562	144	86	179	1962	376	2046	34301	39247	522	134	79	166	1818	350	1898	31560	36148
Huludao	280.7	280.1	280.5	720	185	110	234	2544	482	2643	46078	52467	680	174	104	220	2397	455	2492	43126	49150	582	149	89	187	2038	389	2123	36038	41170
HuZhou	263.78	263.71	264.84	794	203	121	260	2824	530	2927	52282	59357	677	174	103	220	2391	453	2484	43308	49313	537	138	82	172	1881	360	1960	33195	37933
HuaiAn	485.21	487.2	489	1615	413	247	533	5778	1078	5979	108668	123118	1318	337	201	429	4666	881	4844	85103	96812	1198	307	182	387	4226	801	4393	76116	86734
HuiZhou	472.66	475.55	477.5	659	170	100	208	2286	442	2390	39118	44895	455	117	69	142	1565	305	1640	26220	30185	448	116	68	140	1541	301	1616	25808	29714
JiLin	427.65	426.24	422.46	1215	311	185	396	4312	812	4474	79177	89990	1139	292	174	370	4033	762	4188	73445	83567	749	192	114	239	2611	501	2724	45509	52094
JiMo	119.42	120.2	121.45	277	71	43	90	975	186	1014	17445	19897	282	73	43	91	992	189	1032	17764	20259	282	73	43	91	993	189	1033	17776	20273
Jin	706.7	713.2	723.31	3182	809	488	1077	11597	2119	11924	231165	259987	3261	829	501	1105	11901	2172	12231	238061	267626	2691	686	412	895	9688	1795	10003	185768	209945
JiNing	824	829.92	835.44	3694	940	567	1249	13461	2461	13842	268078	301536	3354	854	514	1124	12138	2236	12511	236473	266712	2829	722	432	934	10131	1889	10479	191073	216401
JiaXing	457	458.5	461.4	1192	305	182	387	4216	797	4380	76545	87130	1104	283	168	357	3890	738	4045	69918	79695	887	228	135	284	3103	594	3235	54479	62298
JiaYuGuan	24.13	24.39	24.59	32	8	5	10	108	21	113	1836	2110	26	7	4	8	89	18	93	1484	1710	30	8	5	10	104	21	109	1758	2022
JiangMen	451.14	451.95	454.4	851	218	129	272	2973	570	3100	52102	59596	619	159	94	196	2145	415	2243	36662	42084	601	155	91	190	2079	403	2175	35459	40717
JiangYin	163.5	163.7	164.2	581	148	89	193	2084	388	2154	39614	44821	544	139	83	180	1946	363	2013	36572	41438	479	123	73	157	1702	320	1765	31359	35625
Jiaon												0									0
JiaoZhou	87.1	87.6	88.52	248	64	38	81	878	166	910	16104	18306	193	50	30	62	675	129	703	12003	13703	196	51	30	63	687	131	715	12220	13949
JiaoZuo	352.25	353.4	354.6	1398	356	214	468	5052	932	5209	98052	110643	1543	393	237	521	5611	1028	5773	111067	125022	1489	379	228	501	5403	993	5564	106074	119523
JieYang	603.54	605.89	609.4	1362	349	207	439	4790	911	4985	85481	97529	996	256	151	316	3466	667	3619	60043	68791	1003	258	152	319	3490	672	3644	60468	69277
JinChang	47.01	47.05	46.98	75	20	12	24	259	50	271	4466	5121	68	18	11	22	236	46	247	4045	4642	57	15	9	18	197	39	206	3339	3838
JinHua	475.07	478.09	481.15	1458	373	223	478	5195	974	5383	96467	109477	1196	306	182	387	4222	800	4388	76245	86851	983	252	149	315	3444	658	3588	60820	69493
JinTan	55.8	55.9	56	155	40	24	51	547	104	568	10005	11379	139	36	22	45	490	93	509	8828	10059	105	27	16	34	366	71	382	6404	7328
JinZhou	305.3	302.6	302.2	924	236	141	303	3290	618	3409	60954	69195	836	214	128	272	2963	559	3076	54200	61634	767	197	117	249	2709	513	2815	49002	55806
JingZhou	574.42	570.59	569.79	2582	657	396	874	9412	1720	9677	187548	210939	1955	499	299	646	7005	1305	7244	132380	149889	1622	415	247	529	5758	1084	5973	105748	120185
JiuJiang	480.69	482.58	484.76	878	226	133	280	3066	588	3198	53579	61309	1055	271	160	339	3705	706	3857	65892	75215	1092	280	166	352	3840	731	3996	68508	78167
JuRong	62.41	62.5	62.58	216	55	33	72	772	144	798	14601	16531	136	35	21	44	478	91	497	8485	9687	112	29	17	36	391	75	408	6816	7802
KaiFeng	454.9	454.26	456.8	1858	473	285	623	6726	1238	6931	131295	148048	1665	425	255	553	5987	1111	6183	114467	129413	1597	408	244	529	5729	1066	5923	108643	122958
Karamay	38.98	40.14	41.78	63	17	10	20	218	42	228	3765	4316	46	12	7	15	159	31	166	2680	3082	46	12	7	15	156	31	163	2619	3015
Korla	56.42	48.7	60.17	163	42	25	53	577	109	598	10602	12049	98	25	15	32	341	66	356	6011	6872	160	41	25	52	565	107	586	10266	11684
KunMing	662.6	667.7	672.8	831	214	126	262	2873	557	3006	48841	56108	708	182	107	222	2442	475	2558	41130	47313	672	173	102	210	2314	451	2424	38854	44715
KunShan	76.97	78.7	82.35	188	49	29	61	663	126	689	11922	13588	181	47	28	59	637	122	663	11388	12991	162	42	25	52	564	108	588	9919	11341
LaSa	52.73	53.03	55.06	40	11	6	13	137	27	144	2264	2612	44	12	7	14	148	29	156	2464	2841	54	14	9	17	184	36	193	3079	3546
LaiWu	134.53	135.16	137.58	650	166	100	222	2382	433	2445	48256	54166	600	153	92	203	2183	400	2245	43360	48788	521	133	80	174	1877	348	1938	36106	40790
LaiXi	74.2	73.99	74.24	217	56	33	71	770	145	798	14177	16107	190	49	29	62	670	127	696	12120	13803	154	40	24	50	539	103	562	9534	10892
LaiZhou	85.5	85.83	85.03	255	65	39	84	906	170	939	16729	18999	220	57	34	72	777	147	807	14056	16007	175	45	27	56	612	117	638	10814	12356
LanZhou	366.49	369.31	370.55	978	251	149	318	3462	654	3595	63030	71719	834	214	127	269	2931	558	3050	52294	59667	914	234	139	296	3224	611	3351	58110	66210
LangFang	450.4	460.1	469.9	2296	583	353	787	8447	1528	8657	173463	194391	1966	501	302	662	7141	1310	7351	140734	158502	1474	377	225	484	5257	985	5445	97936	111097
LiShui	265.65	266.38	268.03	505	130	77	162	1766	338	1841	30966	35416	421	109	64	134	1465	282	1530	25294	28992	343	88	52	108	1186	230	1241	20182	23182
LiYang	76.02	76.09	76.16	229	59	35	75	815	153	845	15088	17130	211	54	32	69	745	141	774	13626	15497	159	41	25	51	557	107	580	9852	11255
LianYunGang	445.17	447.37	449.64	1306	334	199	427	4641	872	4813	85604	97236	1120	287	171	363	3955	749	4110	71426	81360	950	244	144	305	3332	636	3471	59051	67440
LiaoCheng	486.4	548.7	597.06	2478	629	381	850	9117	1649	9344	187181	209769	2796	710	430	959	10288	1860	10544	211238	236726	2407	613	369	806	8709	1605	8977	169589	191287
Lin	52.97	52.94	53.15	159	41	25	52	565	106	586	10445	11861	118	31	18	38	414	79	431	7373	8415	101	26	16	33	353	68	368	6179	7069
LinFen	441.46	443.57	445.8	1297	332	198	424	4612	867	4782	85091	96649	1208	309	184	393	4280	808	4443	78130	88869	1590	406	243	527	5711	1061	5901	108668	122931
LinYi	1113	1124	1140.8	5295	1345	813	1802	19380	3525	19898	391261	439359	4311	1099	659	1437	15549	2875	16044	299837	338616	3688	942	562	1213	13175	2463	13638	246615	279579
LiuZhou	377.94	381.62	385.67	1208	309	185	397	4312	807	4465	80563	91355	844	216	128	271	2963	564	3085	52757	60213	738	190	112	236	2580	494	2690	45285	51787
ZuoZhou	425	428.52	430.64	1313	336	200	431	4679	877	4847	86953	98669	1229	314	187	401	4364	821	4527	80233	91174	1317	337	201	432	4692	880	4861	87065	98815
LuoYang	667.8	674.3	680.1	2395	611	366	794	8604	1598	8890	163881	185368	2384	608	364	790	8555	1591	8842	162544	183916	2553	651	391	850	9197	1703	9494	176642	199589
MaAnShan	222.9	226.2	227.6	732	187	112	241	2614	489	2705	49038	55578	647	166	99	211	2296	432	2381	42183	47939	499	128	76	161	1752	334	1824	31162	35571
MaoMing	604.9	608.08	612.32	943	243	143	299	3280	632	3426	56587	64868	744	192	113	234	2573	499	2693	43681	50190	678	175	103	213	2339	455	2449	39487	45408
MeiZhou	432.33	434.08	436.08	689	177	105	219	2398	462	2504	41430	47483	595	153	90	188	2060	399	2154	35212	40420	450	116	68	141	1551	302	1624	26078	30005
MianYang	473.9	477.19	481.09	1218	312	185	395	4303	814	4470	77961	88766	973	250	148	312	3408	651	3551	60176	68759	1061	272	161	341	3727	710	3880	66344	75722
MuDanJiang	277.2	276.4	275.1	750	192	114	244	2654	501	2755	48400	55060	585	150	89	188	2052	392	2137	36356	41522	411	106	63	130	1426	275	1490	24515	28117
nChang	524.02	530.29	537.14	1211	310	184	390	4261	810	4433	76241	86956	942	242	143	300	3285	631	3427	57261	65546	988	254	150	315	3449	661	3597	60305	69000
nChong	633.38	636.4	640.22	2140	546	327	706	7661	1428	7924	144429	163582	1811	463	276	591	6430	1210	6670	118087	134208	1702	436	259	553	6025	1138	6256	109641	124762
nJing	821.61	823.59	827	2982	761	456	990	10718	1989	11072	204578	231339	2166	554	330	703	7661	1448	7957	139224	158456	1758	451	267	564	6167	1176	6423	109362	124886
nNing	729.66	698.61	706.22	1568	402	238	504	5503	1049	5731	97698	111549	1219	313	185	388	4252	817	4437	74025	84750	1050	270	159	332	3646	704	3811	62692	71903
nTong	729.8	730	730.2	2128	544	324	695	7564	1422	7844	139404	158362	1936	495	295	629	6850	1294	7114	124619	141813	1563	401	237	502	5486	1046	5712	97341	111148
NingBo	780.6	782.5	787.5	1564	401	237	501	5478	1047	5709	96570	110368	1523	391	231	487	5329	1020	5555	93677	107104	1260	324	191	400	4383	844	4577	75762	86826
PanZhiHua	123.2	123.25	110.56	199	52	31	64	693	134	724	11981	13731	148	38	23	47	511	99	535	8660	9953	132	34	20	42	455	89	476	7709	8861
PanJin	129.2	129.5	130.1	350	90	54	114	1238	234	1286	22583	25691	296	76	45	96	1041	198	1083	18596	21214	217	56	33	69	754	145	787	13062	14965
PengLai												0									0
PingDingShan	402.7	404.2	404.8	1793	456	275	606	6531	1195	6717	129857	146093	1810	461	278	612	6595	1206	6782	131295	147688	1479	377	226	491	5316	986	5491	101583	114855
PingDu	845.5	136.21	137.26	2471	632	376	807	8783	1651	9107	161917	183929	326	84	50	106	1148	218	1194	20619	23505	317	82	49	102	1115	212	1160	19933	22737
Qiqihar	553.2	536.7	532.4	853	219	129	270	2964	572	3097	51096	58582	817	210	124	259	2840	548	2967	48906	56078	753	194	114	238	2610	504	2729	44712	51308
QinHuangDao	306.45	307.32	309.46	858	220	131	280	3044	574	3158	55771	63405	640	164	97	205	2244	429	2337	39700	45350	627	161	95	201	2196	420	2288	38747	44278
QingDao	904.62	909.7	920.4	2294	587	349	743	8103	1534	8420	146586	166937	2094	537	318	675	7369	1401	7666	131788	150318	1786	458	271	571	6248	1195	6513	109793	125535
QingYuan	381.91	383.45	384.6	699	179	106	223	2439	468	2544	42618	48768	505	130	77	159	1748	338	1828	29795	34214	562	145	85	178	1952	377	2040	33514	38445
ZuoZhou	212.4	213.3	216.2	553	142	84	180	1955	370	2031	35484	40393	392	101	60	125	1369	263	1428	23927	27379	386	99	59	123	1346	259	1404	23464	26859
QuJing	600.9	600.9	608.4	837	215	127	265	2903	561	3035	49677	57013	670	172	101	210	2310	449	2419	39015	44863	712	183	108	224	2460	478	2575	41648	47873
QuanZhou	844	851	858	1038	267	157	327	3589	696	3756	60954	70033	801	206	121	251	2758	538	2890	46190	53177	871	224	132	273	3001	584	3144	50441	58041
RiZhao	287.05	288	290.11	853	218	130	279	3033	570	3144	56034	63634	840	215	128	275	2984	561	3094	54980	62459	792	203	121	258	2806	530	2913	51238	58279
RongCheng	66.94	66.78		137	35	21	44	478	92	498	8435	9640	93	24	14	30	320	62	335	5466	6276
RuShan		55.83										0	77	20	12	25	265	52	277	4517	5188
SanMenXia	227.79	228.53	229.5	848	217	130	282	3053	566	3152	58532	66151	833	213	128	277	2995	556	3093	57197	64674	743	190	114	245	2654	496	2747	49676	56316
SanYa	74.19	74.89	75.43	36	10	6	11	121	24	127	1971	2279	30	8	5	10	101	20	106	1646	1903	16	4	3	5	52	11	54	827	960
ShangHai	2425.68	2415.27	2419.7	5779	1480	878	1865	20364	3865	21177	365652	416837	5939	1520	902	1920	20954	3971	21782	377656	430302	4700	1205	712	1502	16444	3146	17142	289038	330470
ShanTou	546.57	555.21	557.92	898	231	136	285	3126	602	3264	54147	62037	693	178	105	218	2397	465	2508	40743	46806	626	161	95	197	2161	420	2263	36502	41972
ShanWei	300.66	302.16	303.66	389	100	59	123	1346	261	1408	22919	26323	297	77	45	93	1023	200	1072	17163	19755	246	64	37	77	842	165	884	14014	16151
ShaoGuan	290.89	293.15	295.61	627	161	96	202	2201	420	2292	39087	44627	390	100	59	123	1349	261	1411	23017	26428	387	100	59	122	1337	259	1399	22792	26174
ShaoXing	495.6	496.8	498.8	1484	379	226	486	5279	991	5472	97664	110890	1248	320	190	404	4406	834	4579	79600	90667	1004	258	153	322	3516	672	3664	62006	70862
ShenYang	828.7	829.1	829.2	2857	729	436	944	10241	1907	10589	193733	219327	2885	736	441	954	10345	1925	10695	196009	221859	2044	523	311	661	7212	1367	7496	130007	148126
ShenZhen	1077.89	1137.87	1190.84	1378	354	209	434	4770	924	4990	81195	93257	1251	322	189	392	4316	839	4520	72846	83772	1128	290	170	353	3882	756	4069	65044	74879
ShiJiaZhuang	1061.62	1070.16	1078.46	6682	1690	1033	2353	25058	4436	25517	546645	608338	4781	1216	733	1617	17419	3185	17913	346624	389922	5487	1393	844	1881	20189	3651	20693	414425	464445
ShiZuiShan	77.27	78.8	79.51	170	44	26	55	595	114	619	10572	12070	169	44	26	55	593	113	617	10514	12006	161	42	25	52	564	108	588	9948	11369
ShouGuang	106.69	107.38	108.47	470	120	72	159	1708	313	1757	33868	38116	460	117	71	155	1668	306	1717	32865	37016	351	90	54	116	1251	234	1295	23407	26538
SuQian	484.32	485.38	487.94	1616	413	247	533	5781	1079	5981	108757	123214	1391	356	212	454	4940	930	5125	90824	103210	1257	322	191	408	4443	841	4616	80534	91691
SuZhou	1060.4	1061.6	1062.57	3362	859	513	1105	11999	2245	12426	223929	253961	2868	734	436	932	10157	1917	10545	185243	210730	2171	557	329	696	7609	1453	7927	134385	153545
TaiAn	558.1	560.08	563.74	2107	537	322	702	7593	1406	7838	145991	164935	1875	479	286	619	6710	1252	6942	126305	143084	1781	455	272	585	6354	1189	6580	118500	134404
TaiCang	70.85	70.95	71.2	190	49	29	62	671	127	697	12219	13904	160	41	25	52	560	107	583	9986	11396	128	33	20	41	446	86	466	7780	8906
TaiYuan	429.89	431.87	434.44	1422	363	217	469	5086	950	5263	95544	108265	1228	314	187	401	4357	820	4520	80007	90932	1386	354	212	456	4948	926	5123	92420	104803
TaiZhou	601.5	604.9	608	1226	315	186	393	4297	821	4477	75873	86694	1085	279	165	346	3785	726	3949	66037	75582	878	226	133	278	3048	589	3186	52289	59990
TaiZhou	463.86	464.16	464.58	1640	419	251	543	5886	1095	6084	111835	126540	1329	340	203	434	4720	888	4896	86767	98600	1166	299	178	378	4117	780	4278	74371	84712
TangShan	776.8	780.1	784.4	4047	1027	623	1391	14919	2692	15281	308118	345057	3307	842	507	1112	12004	2204	12359	236154	266028	2850	727	436	946	10247	1902	10585	195638	221222
TianJin	1516.81	1546.95	1562.12	6639	1689	1018	2240	24155	4423	24851	478508	538576	5247	1339	801	1732	18793	3502	19437	354546	401525	5181	1323	790	1707	18533	3459	19177	348362	394712
TongChuan	84.51			273	70	42	90	973	182	1008	18200	20636									0
WaFangDian												0									0
WeiFang	924.72	927.72	935.7	3586	914	549	1197	12943	2391	13352	250113	282385	3256	831	497	1078	11683	2173	12077	221701	250890	2885	737	440	946	10281	1927	10652	191044	216789
WeiHai	280.92	280.53	281.93	485	125	74	155	1690	325	1764	29390	33654	437	112	66	139	1517	293	1585	26165	29997	375	97	57	118	1297	251	1356	22119	25398
Wein	534.3	535.99	537.16	1959	500	300	651	7048	1307	7279	134769	152362	1478	378	225	481	5239	988	5438	95805	108948	2018	515	309	672	7268	1346	7503	139607	157742
WenDeng												0									0
WenZhou	906.8	911.7	917.5	1839	472	279	589	6442	1231	6712	113688	129912	1724	442	262	550	6026	1154	6284	105649	120837	1470	378	223	466	5115	985	5342	88441	101353
WuHan	1033.8	1060.77	1076.62	4159	1059	637	1392	15044	2772	15507	292803	330285	3542	904	541	1168	12675	2365	13113	238498	270193	2854	730	434	927	10099	1907	10487	183712	209059
WuHu	361.7	365.4	367	1181	302	181	389	4222	789	4370	79145	89707	973	249	148	316	3443	650	3575	62656	71297	892	229	136	288	3144	596	3269	56571	64472
WuJiang	81.43	81.8	82.45	226	58	35	74	801	151	831	14649	16658	209	54	32	68	737	140	766	13331	15183	163	42	25	52	568	109	592	9982	11414
Urumqi	353	355	351.96	1069	273	163	350	3804	714	3943	70491	80021	1097	280	167	360	3908	733	4049	72632	82419	1263	322	193	419	4537	843	4688	86416	97747
WuXi	650.01	651.1	652.9	2111	539	322	695	7544	1410	7809	141309	160183	1884	482	287	615	6694	1259	6942	123222	140001	1574	403	239	508	5547	1052	5767	99723	113663
XiaMen	381	386	392	549	141	83	174	1905	368	1991	32674	37487	423	109	64	133	1458	284	1527	24599	28291	394	102	60	124	1356	264	1421	22774	26209
XiAn	862.75	870.56	883.21	3208	818	490	1067	11548	2140	11923	221399	250218	2354	602	358	765	8339	1574	8657	152098	173022	3084	787	471	1020	11061	2058	11434	209698	237335
XiangTan	281.3	282.37	283.8	982	251	150	325	3522	656	3641	66766	75567	753	193	115	245	2665	504	2767	48511	55200	671	172	102	217	2364	449	2459	42405	48348
XianYang	495.68	497.24	498.66	1725	440	264	571	6184	1151	6393	117165	132618	1418	363	216	463	5034	948	5222	92469	105091	2030	517	311	681	7349	1353	7574	143376	161682
XingTai	725.63	729.44	731.99	4795	1211	743	1700	18070	3181	18370	400514	444930	3770	957	580	1295	13889	2508	14229	286246	320642	3202	815	491	1080	11647	2133	11983	230686	259651
XiNing	229.07	231.08	233.37	660	169	101	216	2343	441	2430	43086	48960	492	126	75	158	1726	329	1798	30605	34950	508	130	77	163	1782	340	1856	31674	36160
XuZhou	863.2	866.9	871	2806	717	428	923	10026	1873	10377	187825	212907	2657	679	405	871	9466	1775	9808	175731	199437	2483	635	378	810	8814	1659	9143	161909	184008
Yan	221.43	223.13	225.28	487	125	74	157	1709	326	1779	30408	34709	460	118	70	148	1610	308	1677	28451	32506	426	110	65	136	1488	285	1551	26077	29827
YanCheng	828.5	722.85	723.5	2262	579	344	736	8016	1512	8320	146386	166496	1592	408	242	512	5594	1065	5823	99560	113634	1348	346	204	430	4708	902	4910	82426	94294
YangJiang	249.4	251.12	252.84	373	96	57	118	1296	250	1354	22286	25559	312	81	48	98	1078	209	1128	18316	21043	291	75	44	92	1005	195	1052	16996	19539
YangQuan	139.27	139.83	140.36	485	124	74	161	1739	324	1798	32948	37294	347	89	53	112	1222	232	1271	22043	25115	406	104	62	133	1441	271	1495	26516	30129
YangZhou	447.79	448.36	449.14	1421	363	217	467	5069	949	5249	94597	107285	1121	287	171	363	3956	749	4111	71424	81361	1026	263	156	331	3610	687	3756	64509	73588
YanTai	653.41	701.41	706.4	1521	390	231	490	5353	1017	5569	95858	109318	1370	352	208	438	4794	917	4997	84293	96371	1179	303	179	375	4106	790	4286	71208	81569
YiBin	447	449	210.3	1406	359	215	462	5014	939	5193	93440	105992	1215	311	185	395	4301	812	4465	78446	89239	541	139	83	176	1910	362	1984	34604	39401
YiChang	410.45	411.5	413	1942	494	298	660	7102	1293	7293	143184	160814	1407	359	215	465	5041	939	5213	95222	107822	1215	311	185	397	4319	812	4478	79699	90523
YinChuan	212.89	216.41	219.11	440	113	67	141	1541	295	1606	27245	31127	467	120	71	150	1637	312	1705	29072	33193	553	142	84	179	1954	370	2030	35318	40225
YingKou	244.6	244.3	244	417	107	64	133	1454	280	1517	25255	28923	533	137	81	171	1870	357	1947	33249	37956	471	121	72	151	1647	315	1717	28914	33064
YiWu	125.1	125.88	128.04	357	92	55	117	1268	239	1315	23283	26462	294	76	45	95	1035	197	1077	18533	21136	235	61	36	75	820	158	855	14330	16398
YiXing	125.16	125.33	125.44	341	87	52	111	1206	228	1251	21996	25022	277	71	42	89	972	185	1012	17301	19747	244	63	37	78	854	164	890	15005	17157
YueYang	559.51	562.92	568.11	1497	383	228	487	5301	1001	5504	96551	109854	1352	346	206	437	4765	904	4954	85624	97599	1234	317	188	397	4333	826	4512	77010	87915
YunFu	244.46	246.05	248.08	304	79	46	96	1051	204	1100	17859	20518	333	86	51	105	1153	223	1205	19684	22598	331	85	50	105	1146	222	1199	19553	22451
YuXi	235	236	237.5	262	68	40	83	904	176	947	15265	17554	183	47	28	57	626	123	657	10396	11985	196	51	30	61	672	132	705	11194	12899
ZaoZhuang	401.33	387.8	413.23	1799	458	276	609	6555	1198	6740	130531	146823	1706	434	262	576	6206	1136	6385	123069	138502	1587	405	243	529	5723	1058	5905	110374	124647
ZhangJiaGang	162.82	125.31	125.55	506	130	78	166	1804	338	1869	33557	38074	340	87	52	111	1201	227	1247	21907	24922	311	80	48	101	1096	208	1139	19752	22506
ZhangJiaJie	172.12	169.97	152.91	486	125	74	159	1725	325	1789	31631	35956	389	100	60	126	1369	261	1425	24466	27910	323	83	49	104	1132	216	1179	20051	22901
ZhangJiaKou	442.09	442.17	442.51	627	161	95	198	2175	420	2273	37263	42758	576	148	87	182	1992	386	2084	33945	38983	532	137	81	167	1837	357	1923	31157	35806
ZhangQiu	102.42	102.6		248	64	38	81	874	166	909	15723	17920	354	91	54	117	1267	236	1310	23949	27116
ZhanJiang	721.24	724.14	727.3	730	188	111	229	2517	490	2637	42297	48671	722	186	109	226	2487	484	2605	41757	48055	674	174	102	211	2320	452	2432	38832	44710
ZhaoQing	403.58	405.96	408.46	1009	258	154	327	3560	675	3700	64277	73221	655	168	99	208	2279	439	2380	39412	45165	622	160	95	197	2162	417	2259	37233	42693
ZhaoYuan	56.82	56.65	56.59	167	43	26	55	594	112	616	10944	12433	136	35	21	44	480	91	499	8613	9819	118	31	18	38	411	79	429	7269	8306
ZhengZhou	937.8	810.49	972.4	4178	1063	641	1412	15219	2783	15652	302667	340499	4004	1017	615	1368	14697	2665	15076	299457	335899	3798	968	581	1268	13712	2532	14144	265345	299531
ZhenJiang	317.14	317.65	318.13	1031	264	158	339	3683	688	3812	68982	78196	881	226	134	287	3124	589	3242	57165	65001	721	185	110	232	2533	482	2636	45222	51594
ZhongShan	319.27	320.96	323	497	128	76	158	1727	333	1804	29778	34139	408	105	62	129	1413	274	1478	24033	27606	359	93	55	113	1237	241	1296	20886	24019
ZhouShan	97.49	97.36	97.33	107	28	17	34	368	72	385	6196	7128	106	28	16	34	365	71	382	6142	7066	84	22	13	26	287	56	301	4777	5505
ZhuHai	161.42	163.41	167.53	215	56	33	68	745	144	779	12699	14582	192	50	29	61	662	129	693	11201	12877	154	40	24	49	530	104	555	8859	10202
ZhuJi	108.04	108.1	108.21	332	85	51	109	1183	222	1226	21964	24927	9	3	2	3	29	6	30	457	531	60	16	9	18	199	40	210	3099	3608
ZhuZhou	396.1	400.1	401.63	1382	353	211	457	4956	922	5124	93949	106333	1004	257	153	325	3545	672	3684	64035	72940	919	236	140	296	3233	615	3363	57768	65898
ZiBo	461.5	464.2	468.7	2239	569	344	764	8205	1490	8420	166416	186770	2057	524	316	695	7490	1371	7704	148766	167388	1734	442	265	577	6240	1157	6443	119513	135087
ZiGong	274.58	277.02	278.08	975	249	149	323	3501	651	3618	66572	75317	1003	256	154	333	3604	669	3723	68748	77747	999	255	153	332	3589	667	3708	68368	77331
ZunYi	615.49	619.21	622.84	1612	413	245	523	5701	1078	5922	103557	117870	1101	283	167	351	3841	737	4007	66962	76648	1192	306	181	381	4169	798	4347	73174	83680
SUM	88334.6	87900.4	88525.2	278444	71058	42590	92512	1001233	185798	1034080	19197994	21697549	238622	60991	36431	78444	851497	159366	881692	15935983	18067160	216164	55321	32959	70557	767387	144459	795978	14130036	16054024

## Sheet: Change in All-cause mortality
Area	2014	2015	2016	2014-2015	2015-2016
AnShan	1181	1155	886	-26	-269
AnYang	2192	2081	1943	-111	-138
BaoDing	6594	5745	4909	-849	-836
BaoJi	1283	980	1044	-303	64
BaoTou	658	639	587	-19	-52
BeiHai	185	178	166	-7	-12
BeiJing	9220	8688	7753	-532	-935
BenXi	408	377	292	-31	-85
BinZhou	1654	1530	1415	-124	-115
CangZhou	3427	2633	2565	-794	-68
ChangChun	2371	2322	1531	-49	-791
ChangDe	1933	1293	1505	-640	212
ChangSha	2477	1921	1875	-556	-46
ChangShu	372	396	332	24	-64
ChangZhi	1087	1053	1145	-34	92
ChangZhou	1504	1299	1140	-205	-159
ChaoZhou	590	428	349	-162	-79
ChengDe	942	682	632	-260	-50
ChengDu	5149	4346	4745	-803	399
ChiFeng	902	755	641	-147	-114
ChongQing	8961	7654	7553	-1307	-101
DaLian	1419	1258	1073	-161	-185
DanDong	515	486	431	-29	-55
DaQing	515	534	421	19	-113
DaTong	624	571	511	-53	-60
DeYang	1026	854	846	-172	-8
DeZhou	3116	2985	2382	-131	-603
DongZuo	1593	1220	1163	-373	-57
DongYing	807	833	653	26	-180
ordos	197	198	156	1	-42
FoShan	1420	1217	1179	-203	-38
FuShun	572	518	404	-54	-114
FuYang	200	160	124	-40	-36
FuZhou	910	781	730	-129	-51
GuangZhou	2772	2175	2039	-597	-136
GuiLin	1458	1096	1039	-362	-57
GuiYang	909	729	704	-180	-25
Harbin	3473	3255	2231	-218	-1024
HaiKou	151	142	140	-9	-2
HaiMen	245	237	199	-8	-38
HanDan	6098	4859	4247	-1239	-612
HangZhou	2583	2310	2009	-273	-301
HeFei	3072	2437	2104	-635	-333
HeZe	4354	4111	3509	-243	-602
HeYuan	520	419	368	-101	-51
HengShui	2400	2261	1964	-139	-297
Hohhot	578	562	522	-16	-40
Huludao	720	680	582	-40	-98
HuZhou	794	677	537	-117	-140
HuaiAn	1615	1318	1198	-297	-120
HuiZhou	659	455	448	-204	-7
JiLin	1215	1139	749	-76	-390
JiMo	277	282	282	5	0
Jin	3182	3261	2691	79	-570
JiNing	3694	3354	2829	-340	-525
JiaXing	1192	1104	887	-88	-217
JiaYuGuan	32	26	30	-6	4
JiangMen	851	619	601	-232	-18
JiangYin	581	544	479	-37	-65
Jiaon				0	0
JiaoZhou	248	193	196	-55	3
JiaoZuo	1398	1543	1489	145	-54
JieYang	1362	996	1003	-366	7
JinChang	75	68	57	-7	-11
JinHua	1458	1196	983	-262	-213
JinTan	155	139	105	-16	-34
JinZhou	924	836	767	-88	-69
JingZhou	2582	1955	1622	-627	-333
JiuJiang	878	1055	1092	177	37
JuRong	216	136	112	-80	-24
KaiFeng	1858	1665	1597	-193	-68
Karamay	63	46	46	-17	0
Korla	163	98	160	-65	62
KunMing	831	708	672	-123	-36
KunShan	188	181	162	-7	-19
LaSa	40	44	54	4	10
LaiWu	650	600	521	-50	-79
LaiXi	217	190	154	-27	-36
LaiZhou	255	220	175	-35	-45
LanZhou	978	834	914	-144	80
LangFang	2296	1966	1474	-330	-492
LiShui	505	421	343	-84	-78
LiYang	229	211	159	-18	-52
LianYunGang	1306	1120	950	-186	-170
LiaoCheng	2478	2796	2407	318	-389
Lin	159	118	101	-41	-17
LinFen	1297	1208	1590	-89	382
LinYi	5295	4311	3688	-984	-623
LiuZhou	1208	844	738	-364	-106
ZuoZhou	1313	1229	1317	-84	88
LuoYang	2395	2384	2553	-11	169
MaAnShan	732	647	499	-85	-148
MaoMing	943	744	678	-199	-66
MeiZhou	689	595	450	-94	-145
MianYang	1218	973	1061	-245	88
MuDanJiang	750	585	411	-165	-174
nChang	1211	942	988	-269	46
nChong	2140	1811	1702	-329	-109
nJing	2982	2166	1758	-816	-408
nNing	1568	1219	1050	-349	-169
nTong	2128	1936	1563	-192	-373
NingBo	1564	1523	1260	-41	-263
PanZhiHua	199	148	132	-51	-16
PanJin	350	296	217	-54	-79
PengLai				0	0
PingDingShan	1793	1810	1479	17	-331
PingDu	2471	326	317	-2145	-9
Qiqihar	853	817	753	-36	-64
QinHuangDao	858	640	627	-218	-13
QingDao	2294	2094	1786	-200	-308
QingYuan	699	505	562	-194	57
ZuoZhou	553	392	386	-161	-6
QuJing	837	670	712	-167	42
QuanZhou	1038	801	871	-237	70
RiZhao	853	840	792	-13	-48
RongCheng	137	93		-44	-93
RuShan		77		77	-77
SanMenXia	848	833	743	-15	-90
SanYa	36	30	16	-6	-14
ShangHai	5779	5939	4700	160	-1239
ShanTou	898	693	626	-205	-67
ShanWei	389	297	246	-92	-51
ShaoGuan	627	390	387	-237	-3
ShaoXing	1484	1248	1004	-236	-244
ShenYang	2857	2885	2044	28	-841
ShenZhen	1378	1251	1128	-127	-123
ShiJiaZhuang	6682	4781	5487	-1901	706
ShiZuiShan	170	169	161	-1	-8
ShouGuang	470	460	351	-10	-109
SuQian	1616	1391	1257	-225	-134
SuZhou	3362	2868	2171	-494	-697
TaiAn	2107	1875	1781	-232	-94
TaiCang	190	160	128	-30	-32
TaiYuan	1422	1228	1386	-194	158
TaiZhou	1226	1085	878	-141	-207
TaiZhou	1640	1329	1166	-311	-163
TangShan	4047	3307	2850	-740	-457
TianJin	6639	5247	5181	-1392	-66
TongChuan	273			-273	0
WaFangDian				0	0
WeiFang	3586	3256	2885	-330	-371
WeiHai	485	437	375	-48	-62
Wein	1959	1478	2018	-481	540
WenDeng				0	0
WenZhou	1839	1724	1470	-115	-254
WuHan	4159	3542	2854	-617	-688
WuHu	1181	973	892	-208	-81
WuJiang	226	209	163	-17	-46
Urumqi	1069	1097	1263	28	166
WuXi	2111	1884	1574	-227	-310
XiaMen	549	423	394	-126	-29
XiAn	3208	2354	3084	-854	730
XiangTan	982	753	671	-229	-82
XianYang	1725	1418	2030	-307	612
XingTai	4795	3770	3202	-1025	-568
XiNing	660	492	508	-168	16
XuZhou	2806	2657	2483	-149	-174
Yan	487	460	426	-27	-34
YanCheng	2262	1592	1348	-670	-244
YangJiang	373	312	291	-61	-21
YangQuan	485	347	406	-138	59
YangZhou	1421	1121	1026	-300	-95
YanTai	1521	1370	1179	-151	-191
YiBin	1406	1215	541	-191	-674
YiChang	1942	1407	1215	-535	-192
YinChuan	440	467	553	27	86
YingKou	417	533	471	116	-62
YiWu	357	294	235	-63	-59
YiXing	341	277	244	-64	-33
YueYang	1497	1352	1234	-145	-118
YunFu	304	333	331	29	-2
YuXi	262	183	196	-79	13
ZaoZhuang	1799	1706	1587	-93	-119
ZhangJiaGang	506	340	311	-166	-29
ZhangJiaJie	486	389	323	-97	-66
ZhangJiaKou	627	576	532	-51	-44
ZhangQiu	248	354		106	-354
ZhanJiang	730	722	674	-8	-48
ZhaoQing	1009	655	622	-354	-33
ZhaoYuan	167	136	118	-31	-18
ZhengZhou	4178	4004	3798	-174	-206
ZhenJiang	1031	881	721	-150	-160
ZhongShan	497	408	359	-89	-49
ZhouShan	107	106	84	-1	-22
ZhuHai	215	192	154	-23	-38
ZhuJi	332	9	60	-323	51
ZhuZhou	1382	1004	919	-378	-85
ZiBo	2239	2057	1734	-182	-323
ZiGong	975	1003	999	28	-4
ZunYi	1612	1101	1192	-511	91
